# Supplementary material for: Effect of the surface curvature on amyloid-β peptide adsorption for graphene
Source: Royal Society of Chemistry journal article supplement (doi:10.1039/c8ra10015b), 2019-01-01
Supplement: c8ra10015b1.pdf [file c8ra10015b1.pdf]

**Supporting Information**

**Effect of the surface curvature on amyloid- $\beta$  peptides  
adsorption for graphene**

Xiuhua Yin,<sup>†</sup> Baoyu Li,<sup>†</sup> Shengtang Liu,<sup>†</sup> Zonglin Gu,<sup>†</sup> Bo Zhou,<sup>‡</sup> Zaixing Yang<sup>†,\*</sup>

*<sup>†</sup>Institute of Quantitative Biology and Medicine, State Key Laboratory of Radiation  
Medicine and Protection, School of Radiation Medicine and Protection,  
Collaborative Innovation Center of Radiological Medicine of Jiangsu Higher  
Education Institutions, Soochow University, Jiangsu 215123, China.*

*<sup>‡</sup>School of Electronic Engineering, Chengdu Technological University, Chengdu  
611730, China*

**Corresponding Author**

Prof. Zaixing Yang ([zxyang@suda.edu.cn](mailto:zxyang@suda.edu.cn))

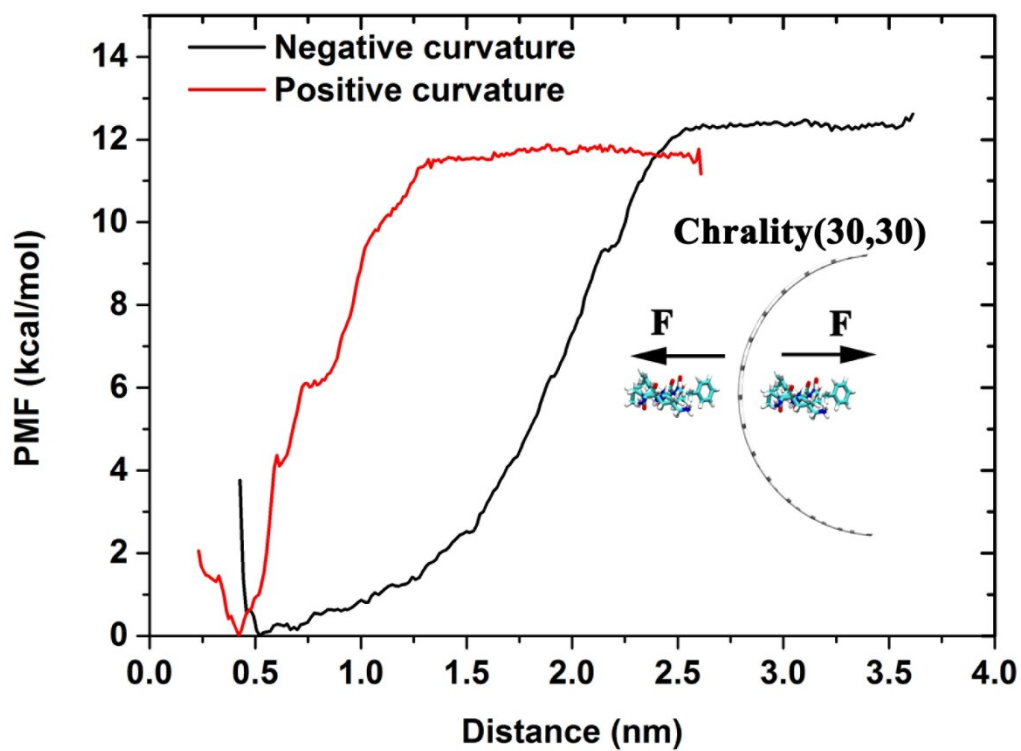

Figure S1. The potential of mean force (PMF) of peptide along the reaction coordinate defined as the distance between the  $\beta$ -sheet's and graphene's (chirality is (30,30)) centers of mass (COMs).
